# Supplementary material
Source: Springer Nature journal article supplement (https://www.springermedizin.de/resource/supplementary/13058_2010_9527_MOESM2_ESM.pdf/9702350)

**A. Overall survival after a breast cancer diagnosis**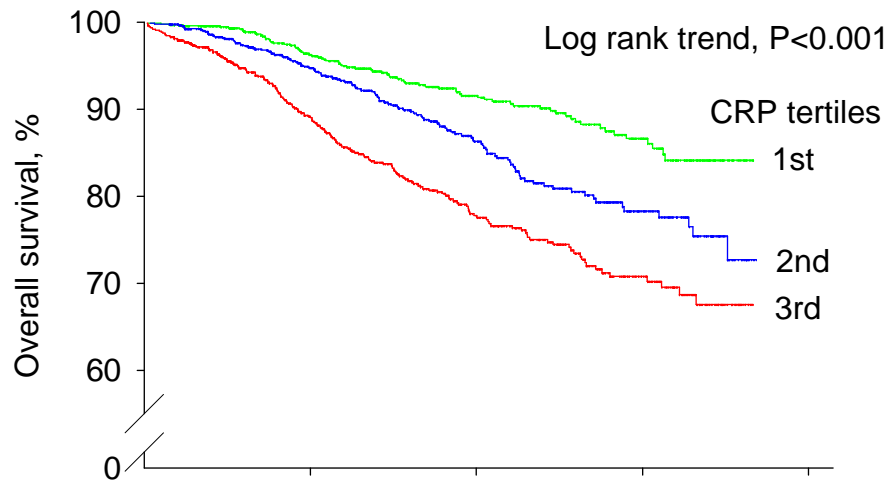**B. Disease-free survival after a breast cancer diagnosis**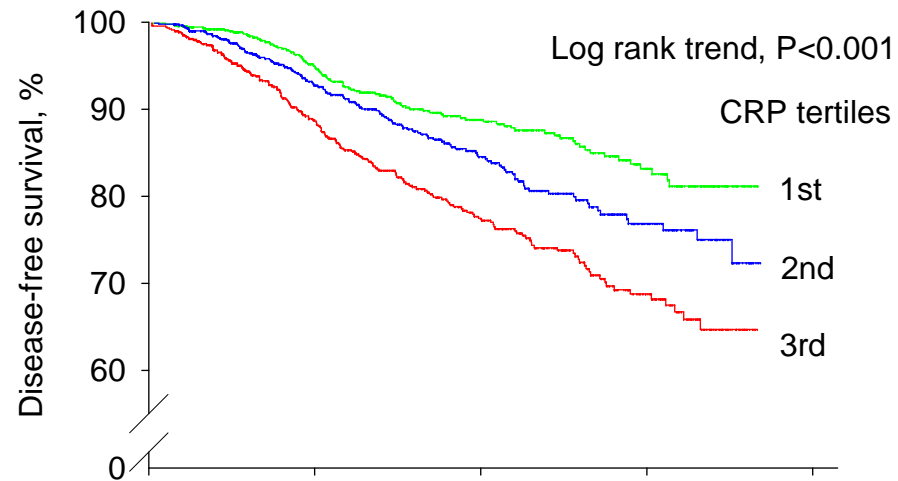**C. Death from breast cancer after a breast cancer diagnosis**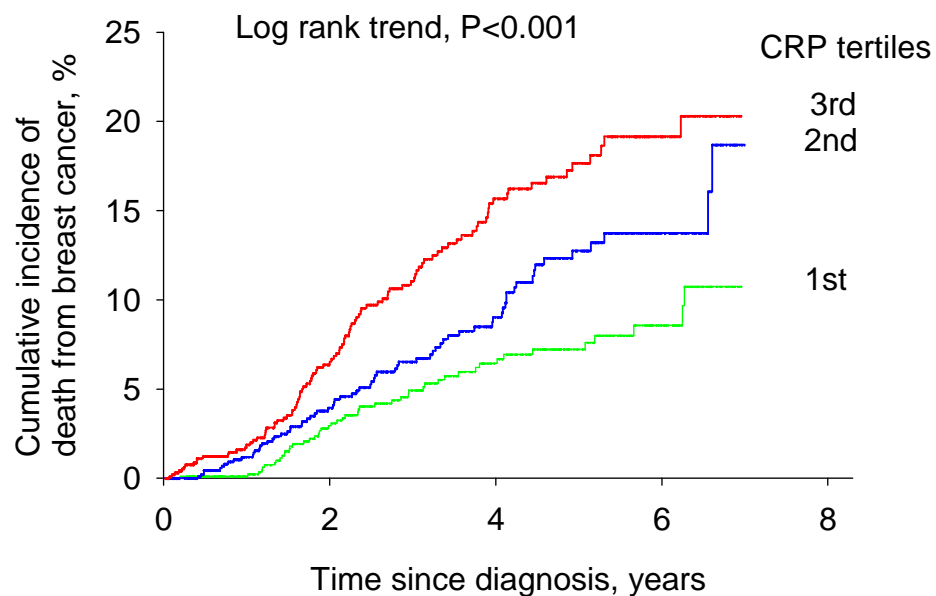**D. Recurrence after a breast cancer diagnosis**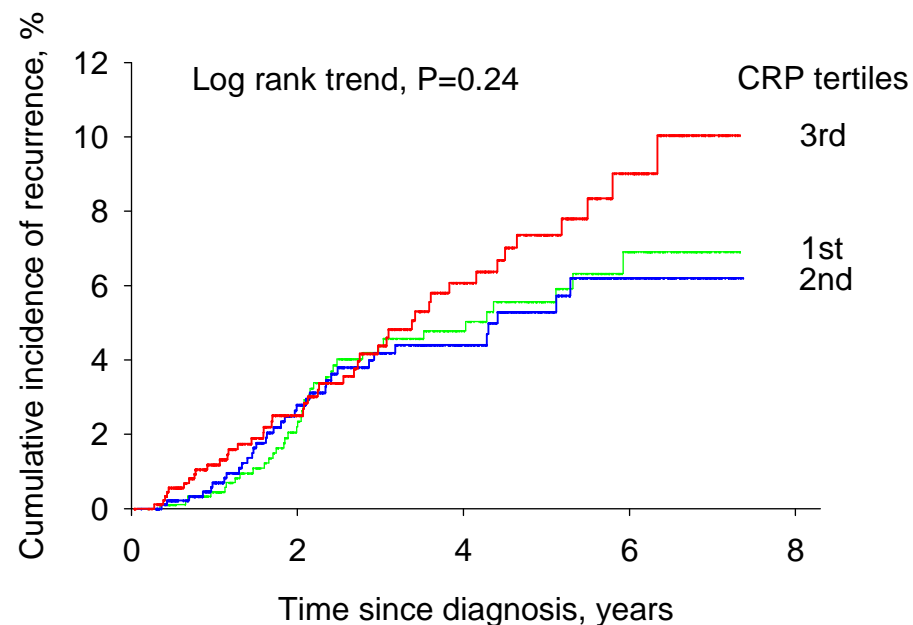

Supplement: MOESM2 [file 9702350]
